# Supplementary material
Source: PubMed Central journal article supplement (PMC3668765)
Supplement: supp_M113.450585_jbc.M113.450585-4.pdf [file supp_M113.450585_jbc.M113.450585-4.pdf]

**Supplemental figure legend:**

**Supplementary figure 1:** Expression of DSS polypeptide and FITC labeling of fusion proteins.

(A) A stained gel showing a representative image of DSS polypeptide purification eluates. (B, C) Representative fluorescent gel images showing the FITC labeled Runx2-DSS (B), GST-DSS and rDSS (C) proteins.

**Supplementary figure 2:** Negative controls:

Representative confocal images showing that there is no non-specific endocytosis of FITC labeled GST protein (A) and FITC labeled runx2 protein (B) alone without the rDSS carrier.

**Supplementary figure 2:** Endocytosis of R2-DSS QD conjugates.

Representative 3D z-stack renderings of R2-DSS QD conjugates (red) endocytosed by MC3T3 cells after incubation with the conjugates for (A) 4 hours and (B) 24 hours. (C) Negative control with BSA QD conjugates incubated with MC3T3 cells for 24 hours. In all the images, green staining represents immunostaining for tubulin.
