# Supplementary material
Source: PubMed Central journal article supplement (PMC3668765)

# Supplementary figure 1

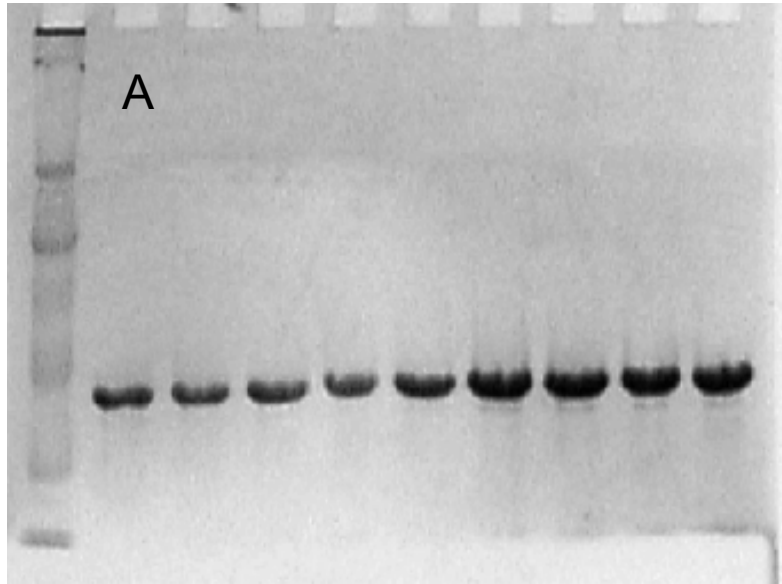

DSS protein

75kDa

25kDa

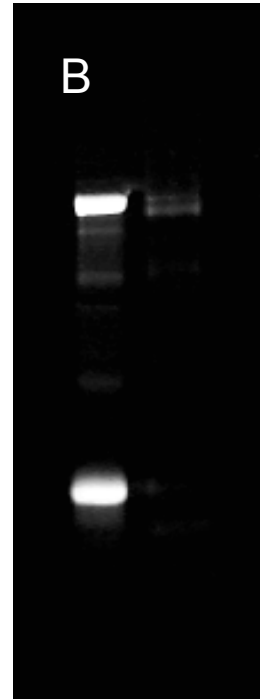

FITC DSS-Runx2

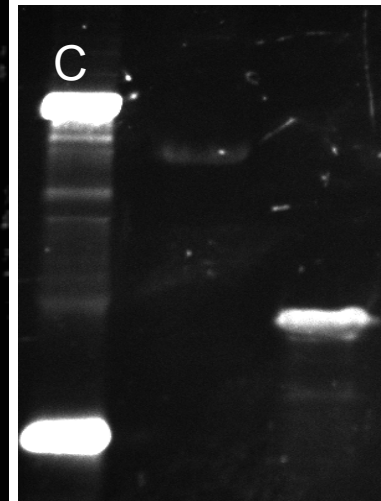

FITC  
GST-DSS

FITC DSS

Supplement: supp_M113.450585_jbc.M113.450585-1.pdf [file supp_M113.450585_jbc.M113.450585-1.pdf]

Supplementary figure 2

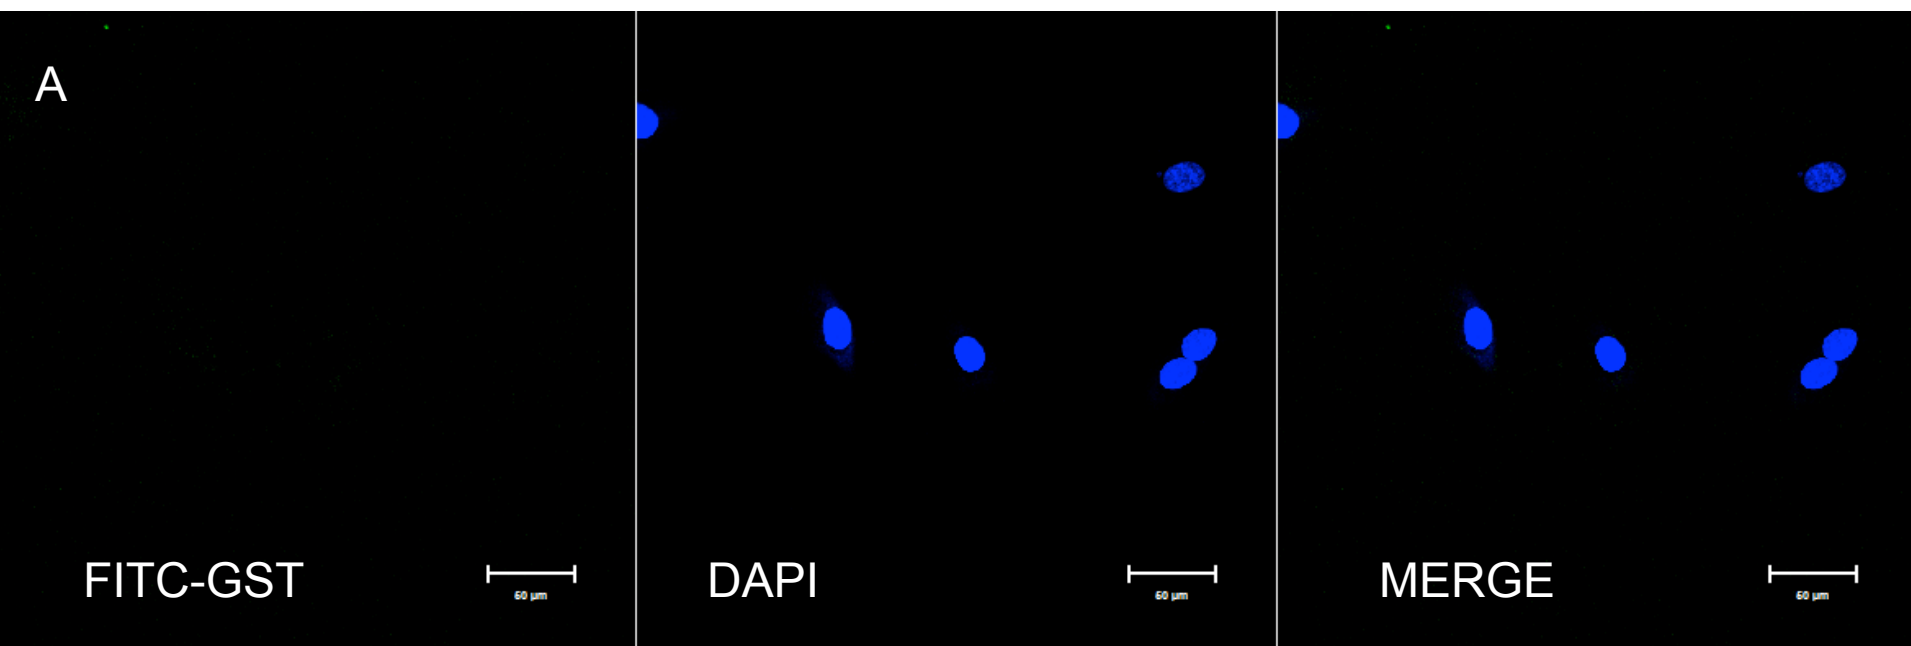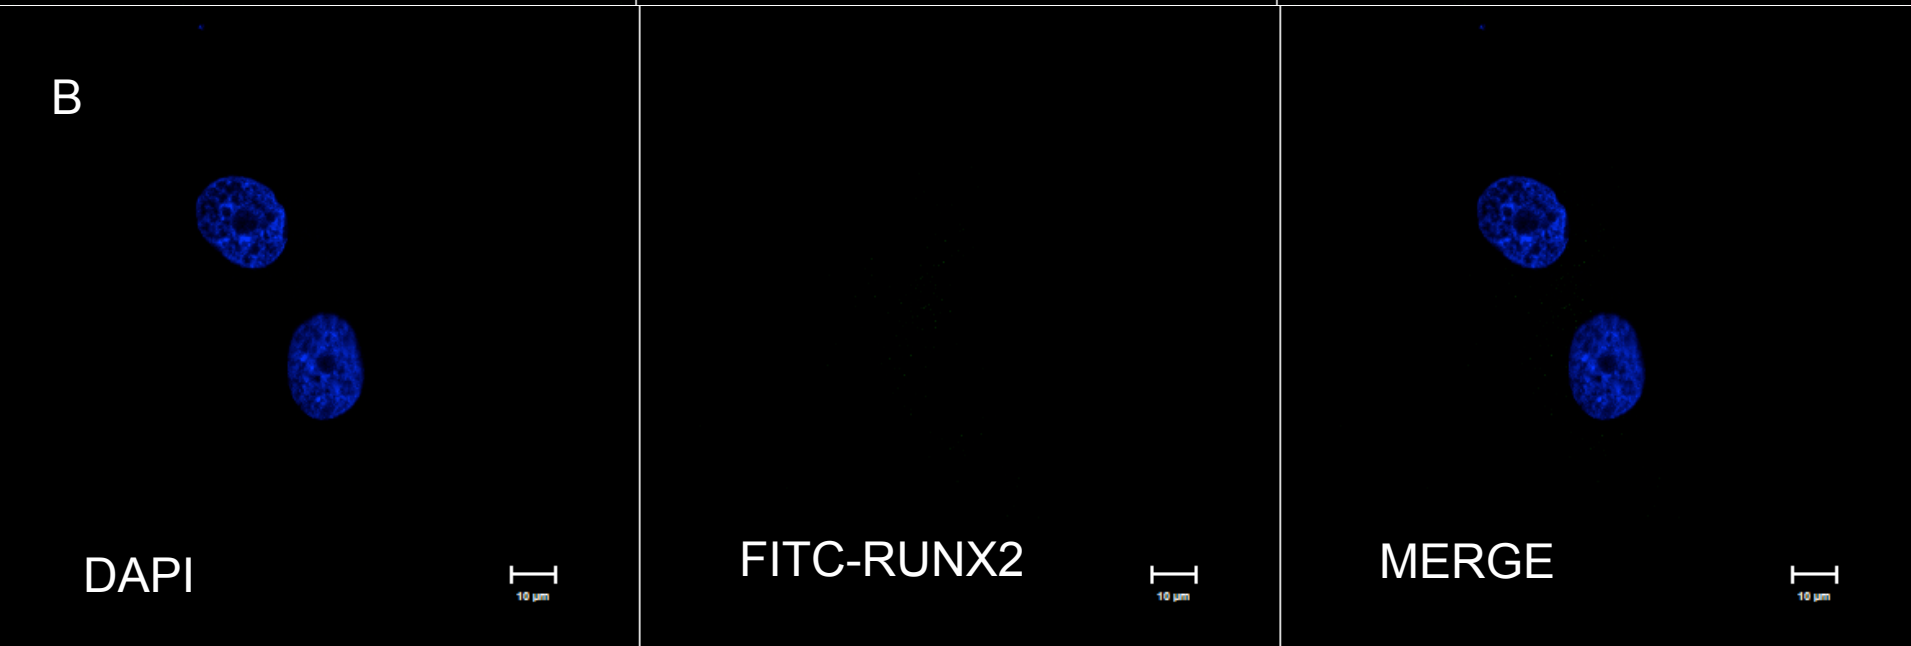

Supplement: supp_M113.450585_jbc.M113.450585-2.pdf [file supp_M113.450585_jbc.M113.450585-2.pdf]

## Supplementary figure 2

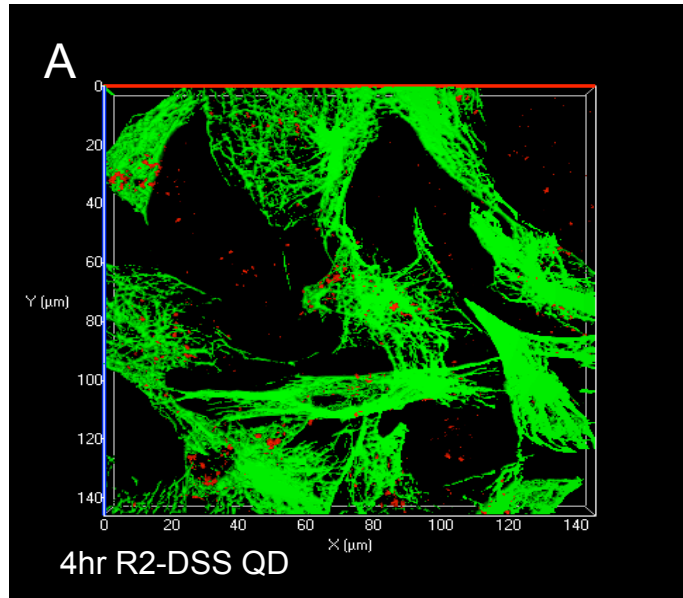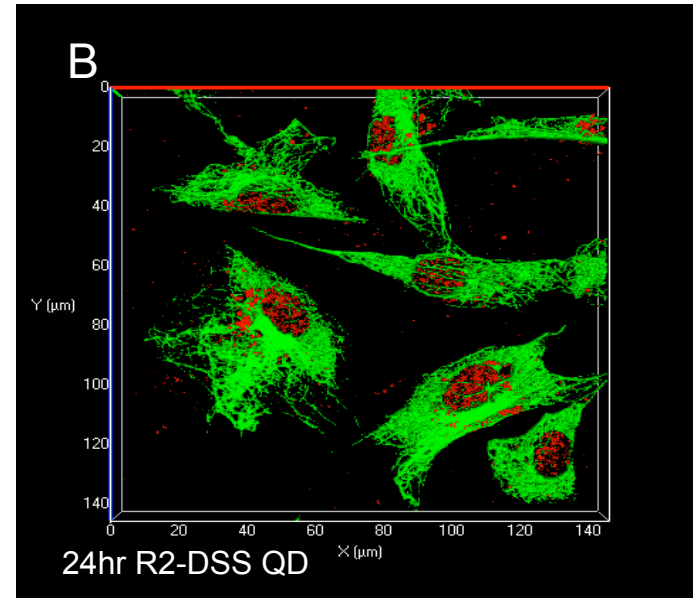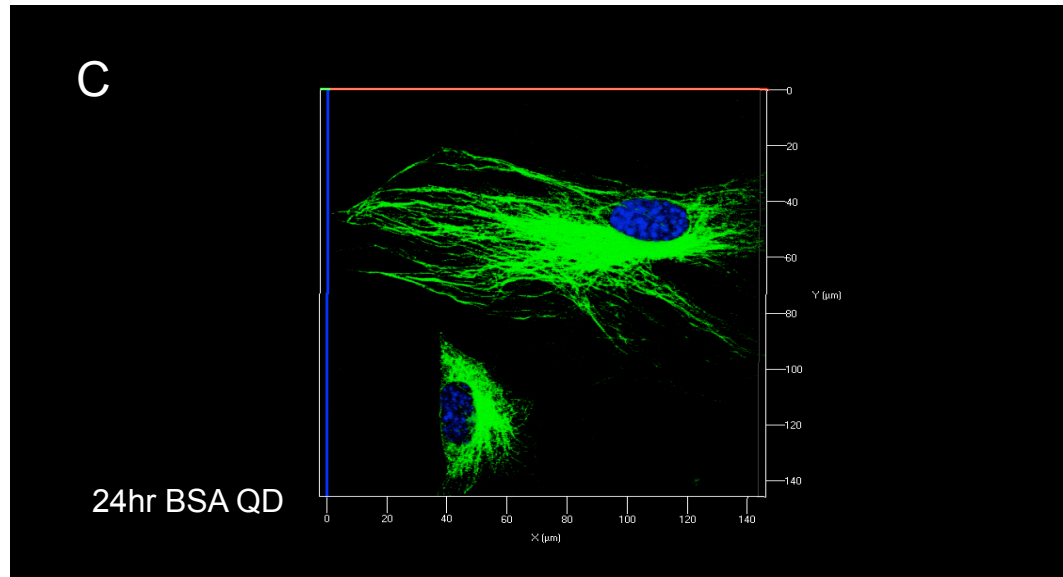

Supplement: supp_M113.450585_jbc.M113.450585-3.pdf [file supp_M113.450585_jbc.M113.450585-3.pdf]
